# Supplementary material
Source: ML conference proceedings conference paper supplement (https://proceedings.mlr.press/v108/chakraborty20a.html)
Supplement: Supplementary file [file chakraborty20a-supp.pdf]

# Supplementary Material: Entropy Weighted Power $k$ -means Clustering

**Saptarshi Chakraborty\***  
Indian Statistical  
Institute, Kolkata, India

**Debolina Paul\***  
Indian Statistical  
Institute, Kolkata, India

**Swagatam Das**  
Electronics and Communication  
Sciences Unit,  
Indian Statistical Institute

**Jason Xu**  
Department of  
Statistical Science,  
Duke University

## 1 Derivation of Closed Form Updates

Consider the minimization problem

$$\sum_{i=1}^n \sum_{j=1}^k \phi_{ij} \|\mathbf{x}_i - \boldsymbol{\theta}_j\|_{\mathbf{w}}^2 + \lambda \sum_{l=1}^p w_l \log w_l \quad (1)$$

with respect to optimization variables  $\Theta$  and  $\mathbf{w}$ . The minimization over  $\Theta$  is straightforward, and the optimal solutions are given by

$$\boldsymbol{\theta}_j^* = \frac{\sum_{i=1}^n \phi_{ij} \mathbf{x}_i}{\sum_{i=1}^n \phi_{ij}}$$

Now to minimize equation 1 in  $\mathbf{w}$ , we consider the Lagrangian

$$\mathcal{L} = \sum_{i=1}^n \sum_{j=1}^k \phi_{ij} \|\mathbf{x}_i - \boldsymbol{\theta}_j\|_{\mathbf{w}}^2 + \lambda \sum_{l=1}^p w_l \log w_l - \alpha \left( \sum_{l=1}^p w_l - 1 \right).$$

The optimality condition  $\frac{\partial \mathcal{L}}{\partial w_l} = 0$  implies  $\sum_{i=1}^n \sum_{j=1}^k \phi_{ij} (x_{il} - \theta_{jl})^2 + \lambda(1 + \log w_l) - \alpha = 0$ . This further implies that

$$w_l^* \propto \exp \left\{ - \frac{\sum_{i=1}^n \sum_{j=1}^k \phi_{ij} (x_{il} - \theta_{jl})^2}{\lambda} \right\}.$$

Now enforcing the constraint  $\sum_{l=1}^p w_l = 1$ , we get

$$w_l^* = \frac{\exp \left\{ - \frac{\sum_{i=1}^n \sum_{j=1}^k \phi_{ij} (x_{il} - \theta_{jl})^2}{\lambda} \right\}}{\sum_{t=1}^p \exp \left\{ - \frac{\sum_{i=1}^n \sum_{j=1}^k \phi_{ij} (x_{it} - \theta_{jt})^2}{\lambda} \right\}}.$$

## 2 Proof of Theorem 1

**Theorem 1** Let  $s \leq 1$  also let  $(\Theta_{n,s}, \mathbf{w}_{n,s})$  be minimizer of  $f_s(\Theta, \mathbf{w})$ . Then we have  $\Theta_{n,s} \in C^k$ .

*Proof.* Let  $P_C^{\mathbf{w}}(\boldsymbol{\theta})$  denote the projection of  $\boldsymbol{\theta}$  onto  $C$  w.r.t. the  $\|\cdot\|_{\mathbf{w}}$  norm. Now for any  $\mathbf{v} \in C$ , using

the obtuse angle condition, we obtain,  $\langle \boldsymbol{\theta} - P_C^{\mathbf{w}}(\boldsymbol{\theta}), \mathbf{v} - P_C^{\mathbf{w}}(\boldsymbol{\theta}) \rangle_{\mathbf{w}} \leq 0$ . Since  $\mathbf{x}_i \in C$ , we obtain,

$$\begin{aligned} \|\mathbf{x}_i - \boldsymbol{\theta}_j\|_{\mathbf{w}}^2 &= \|\mathbf{x}_i - P_C^{\mathbf{w}}(\boldsymbol{\theta}_j)\|_{\mathbf{w}}^2 + \|P_C^{\mathbf{w}}(\boldsymbol{\theta}_j) - \boldsymbol{\theta}_j\|_{\mathbf{w}}^2 \\ &\quad - 2\langle \boldsymbol{\theta} - P_C^{\mathbf{w}}(\boldsymbol{\theta}_j), \mathbf{x}_i - P_C^{\mathbf{w}}(\boldsymbol{\theta}_j) \rangle_{\mathbf{w}} \\ &\geq \|\mathbf{x}_i - P_C^{\mathbf{w}}(\boldsymbol{\theta}_j)\|_{\mathbf{w}}^2 + \|P_C^{\mathbf{w}}(\boldsymbol{\theta}_j) - \boldsymbol{\theta}_j\|_{\mathbf{w}}^2. \end{aligned}$$

Now since,  $M_s(\cdot)$  is an increasing function in each of its argument, if we replace  $\boldsymbol{\theta}_j$  by  $P_C^{\mathbf{w}}(\boldsymbol{\theta}_j)$  in  $M_s(\|\mathbf{x}_i - \boldsymbol{\theta}_1\|_{\mathbf{w}}^2, \dots, \|\mathbf{x}_i - \boldsymbol{\theta}_k\|_{\mathbf{w}}^2)$ , the objective function value doesn't go up. Thus we can effectively restrict our attention to  $C^k$ . Now since the function  $f_s(\cdot, \cdot)$  is continuous on the compact set  $C^k \times [0, 1]^p$ , it attains its minimum on  $C^k \times [0, 1]^p$ . Thus,  $\Theta^* \in C^k$ .  $\square$

## 3 Proof of Theorem 2

**Theorem 2** For any decreasing sequence  $\{s_m\}_{m=1}^{\infty}$  such that  $s_1 \leq 1$  and  $s_m \rightarrow -\infty$ ,  $f_{s_m}(\Theta, \mathbf{w})$  converges uniformly to  $f_{-\infty}(\Theta, \mathbf{w})$  on  $C^k \times [0, 1]^p$ .

For any  $(\Theta, \mathbf{w}) \in C^k \times [0, 1]^p$ ,  $f_{s_m}(\Theta, \mathbf{w})$  converges monotonically to  $f_{-\infty}(\Theta, \mathbf{w})$  (this is due to the power mean inequality). Since  $C^k \times [0, 1]^p$  is compact, the result follows immediately upon applying Dini's theorem from real analysis.

## 4 Proof Details for Uniform Strong Law of Large Numbers

**Theorem 3** (SLLN) Fix  $s \leq 1$ . Let  $\mathcal{G}$  denote the family of functions  $g_{\Theta, \mathbf{w}}(\mathbf{x}) = M_s(\|\mathbf{x} - \boldsymbol{\theta}_1\|_{\mathbf{w}}^2, \dots, \|\mathbf{x} - \boldsymbol{\theta}_k\|_{\mathbf{w}}^2)$ . Then  $\sup_{g \in \mathcal{G}} |\int g dP_n - \int g dP| \rightarrow 0$  a.s.  $[P]$ .

Fix  $\epsilon > 0$ . It is enough to find a finite family of functions  $\mathcal{G}_{\epsilon}$  such that for all  $g \in \mathcal{G}$ , there exists  $\bar{g}, \hat{g} \in \mathcal{G}_{\epsilon}$  such that  $\hat{g} \leq g \leq \bar{g}$  and  $\int (\bar{g} - \hat{g}) dP < \epsilon$ .

Let us define  $\phi(\cdot) : \mathbb{R} \rightarrow \mathbb{R}$  such that  $\phi(x) = \max\{0, x\}$ . Since  $C$  is compact, for every  $\delta_1 > 0$ , we can always construct a finite set  $C_{\delta_1} \subset C$  such that if  $\boldsymbol{\theta} \in C$ , there exist  $\boldsymbol{\theta}' \in C_{\delta_1}$  such that  $\|\boldsymbol{\theta} - \boldsymbol{\theta}'\| < \delta_1$ . Similarly,

resorting to the compactness of  $[0, 1]^p$ , for every  $\delta_2 > 0$ , we can always construct a finite set  $W_{\delta_2} \subset [0, 1]^p$  such that if  $\mathbf{w} \in [0, 1]^p$ , there exist  $\mathbf{w}' \in W_{\delta_2}$  such that  $\|\mathbf{w} - \mathbf{w}'\| < \delta_2$ . Consider the function  $h(\mathbf{x}, \Theta, \mathbf{w}) = M_s(\|\mathbf{x} - \theta_1\|_{\mathbf{w}}^2, \dots, \|\mathbf{x} - \theta_k\|_{\mathbf{w}}^2)$  on  $C \times C^k \times [0, 1]^p$ .  $h$ , being continuous on the compact set  $C \times C^k \times [0, 1]^p$ , is also uniformly continuous. Thus for all  $\mathbf{x} \in C$ , if  $\|\mathbf{w} - \mathbf{w}'\| < \delta_2$  and  $\|\theta_j - \theta'_j\| < \delta_1$  for all  $j = 1, \dots, k$  implies that

$$\left| M_s(\|\mathbf{x} - \theta_1\|_{\mathbf{w}}^2, \dots, \|\mathbf{x} - \theta_k\|_{\mathbf{w}}^2) - M_s(\|\mathbf{x} - \theta'_1\|_{\mathbf{w}'}^2, \dots, \|\mathbf{x} - \theta'_k\|_{\mathbf{w}'}^2) \right| < \epsilon/2 \quad (2)$$

We take

$$\mathcal{G}_\epsilon = \{ \phi(M_s(\|\mathbf{x} - \theta'_1\|_{\mathbf{w}'}^2, \dots, \|\mathbf{x} - \theta'_k\|_{\mathbf{w}'}^2) \pm \epsilon/2) : \theta'_1, \dots, \theta'_k \in C_{\delta_1} \text{ and } \mathbf{w}' \in W_{\delta_2} \}.$$

Now if we take

$$\bar{g}_{\theta, \mathbf{w}} = \phi(M_s(\|\mathbf{x} - \theta'_1\|_{\mathbf{w}'}^2, \dots, \|\mathbf{x} - \theta'_k\|_{\mathbf{w}'}^2) + \epsilon/2)$$

and

$$\dot{g}_{\theta, \mathbf{w}} = \phi(M_s(\|\mathbf{x} - \theta'_1\|_{\mathbf{w}'}^2, \dots, \|\mathbf{x} - \theta'_k\|_{\mathbf{w}'}^2) - \epsilon/2),$$

where  $\theta'_j \in C_{\delta_1}$  and  $\mathbf{w} \in W_{\delta_2}$  for  $j = 1, \dots, k$  such that  $\|\theta_j - \theta'_j\| < \delta_1$  and  $\|\mathbf{w} - \mathbf{w}'\| < \delta_2$ . From equation (2), we get,  $\dot{g} \leq g \leq \bar{g}$ . Now we need to show  $\int (\bar{g} - \dot{g}) dP < \epsilon$ . This step is straight forward.

$$\begin{aligned} & \int (\bar{g} - \dot{g}) dP \\ &= \left[ \phi(M_s(\|\mathbf{x} - \theta'_1\|_{\mathbf{w}'}^2, \dots, \|\mathbf{x} - \theta'_k\|_{\mathbf{w}'}^2) + \epsilon/2) - \phi(M_s(\|\mathbf{x} - \theta'_1\|_{\mathbf{w}'}^2, \dots, \|\mathbf{x} - \theta'_k\|_{\mathbf{w}'}^2) - \epsilon/2) \right] dP \\ &\leq \epsilon \int dP = \epsilon. \end{aligned}$$

Hence the result.

## 5 Proof Details of Main Consistency Result

**Theorem 4** Under the condition A1,  $\Theta_{n,s} \xrightarrow{a.s.} \Theta^*$  and  $\mathbf{w}_{n,s} \xrightarrow{a.s.} \mathbf{w}^*$  as  $n \rightarrow \infty$  and  $s \rightarrow -\infty$ .

*Proof.* It is enough to show that given any neighbourhood  $N$  of  $(\Theta^*, \mathbf{w}^*)$ , there exists  $M_1 < 0$  and  $M_2 > 0$  such that if  $s < M_1$  and  $n > M_2$  such

that  $(\Theta, \mathbf{w}) \in N$  almost surely. By assumption A1, it is enough to show that for all  $\eta > 0$ , there exists  $M_1 < 0$  and  $M_2 > 0$  such that if  $s < M_1$  and  $n > M_2$  such that  $\Phi(\Theta, \mathbf{w}) \leq \Phi(\Theta^*, \mathbf{w}^*) + \eta$  almost surely. For notational convenience, we write  $\mathcal{M}_s(\mathbf{x}, \Theta, \mathbf{w})$  for  $M_s(\|\mathbf{x} - \theta_1\|_{\mathbf{w}}^2, \dots, \|\mathbf{x} - \theta_k\|_{\mathbf{w}}^2)$  and  $\alpha(\mathbf{w}) = \lambda \sum_{l=1}^p w_l \log w_l$ . Now since  $(\Theta_{n,s}, \mathbf{w}_{n,s})$  is the minimizer for  $\int \mathcal{M}_s(\mathbf{x}, \Theta, \mathbf{w}) dP_n + \lambda \sum_{l=1}^p w_l \log w_l$ , we get,

$$\begin{aligned} & \int \mathcal{M}_s(\mathbf{x}, \Theta_{n,s}, \mathbf{w}_{n,s}) dP_n + \lambda \alpha(\mathbf{w}_{n,s}) \\ & \leq \int \mathcal{M}_s(\mathbf{x}, \Theta^*, \mathbf{w}^*) dP_n + \lambda \alpha(\mathbf{w}^*). \end{aligned} \quad (3)$$

Now observe that  $\Phi(\Theta_{n,s}, \mathbf{w}_{n,s}) - \Phi(\Theta^*, \mathbf{w}^*) = \xi_1 + \xi_2 + \xi_3$ , where,

$$\xi_1 = \Phi(\Theta_{n,s}, \mathbf{w}_{n,s}) - \int \mathcal{M}_s(\mathbf{x}, \Theta_{n,s}, \mathbf{w}_{n,s}) dP - \lambda \alpha(\mathbf{w}_{n,s}),$$

$$\xi_2 = \int \mathcal{M}_s(\mathbf{x}, \Theta_{n,s}, \mathbf{w}_{n,s}) dP - \int \mathcal{M}_s(\mathbf{x}, \Theta_{n,s}, \mathbf{w}_{n,s}) dP_n,$$

$$\xi_3 = \int \mathcal{M}_s(\mathbf{x}, \Theta_{n,s}, \mathbf{w}_{n,s}) dP_n + \lambda \alpha(\mathbf{w}_{n,s}) - \Phi(\Theta^*, \mathbf{w}^*).$$

We first choose  $M_1 < 0$  such that if  $s < M_1$  then

$$\left| \min_{1 \leq j \leq k} \|\mathbf{x} - \theta_j\|_{\mathbf{w}} - \mathcal{M}_s(\mathbf{x}, \Theta, \mathbf{w}) \right| < \eta/6 \quad (4)$$

for all  $\mathbf{x} \in C$ ,  $\Theta \in C^k$  and  $\mathbf{w} \in [0, 1]^p$ . Thus for  $s < M_1$ ,  $\min_{1 \leq j \leq k} \|\mathbf{x} - \theta_j\|_{\mathbf{w}} \leq \mathcal{M}_s(\mathbf{x}, \Theta, \mathbf{w}) + \eta/6$  which in turn implies that  $\int \min_{1 \leq j \leq k} \|\mathbf{x} - \theta_j\|_{\mathbf{w}} dP_n \leq \int \mathcal{M}_s(\mathbf{x}, \Theta, \mathbf{w}) dP_n + \eta/3$ . Substituting  $\Theta_{n,s}$  for  $\Theta$  and  $\mathbf{w}_{n,s}$  for  $\mathbf{w}$  in the above expression and adding  $\lambda \alpha(\mathbf{w}_{n,s})$  to both sides, we get  $\xi_1 < \eta/6$ . We also observe that the quantity  $\xi_2$  can also be made smaller than  $\eta/3$  by appealing to the uniform SLLN (Theorem 3). Now to bound  $\xi_3$ , we observe that

$$\begin{aligned} \xi_3 &\leq \int \mathcal{M}_s(\mathbf{x}, \Theta^*, \mathbf{w}^*) dP_n + \lambda \alpha(\mathbf{w}^*) - \Phi(\Theta^*, \mathbf{w}^*) \\ &= \int \mathcal{M}_s(\mathbf{x}, \Theta^*, \mathbf{w}^*) dP_n - \int \min_{\theta \in \Theta^*} \|\mathbf{x} - \theta\|_{\mathbf{w}^*} dP \end{aligned}$$

This inequality is obtained by appealing to equation (3). Again appealing to the uniform SLLN, we get that for large enough  $n$ ,

$$\begin{aligned} \xi_3 &\leq \int \mathcal{M}_s(\mathbf{x}, \Theta^*, \mathbf{w}^*) dP - \int \min_{\theta \in \Theta^*} \|\mathbf{x} - \theta\|_{\mathbf{w}^*} dP + \eta/6 \\ &\leq \int [\min_{\theta \in \Theta^*} \|\mathbf{x} - \theta\|_{\mathbf{w}^*} + \eta/6] dP - \int \min_{\theta \in \Theta^*} \|\mathbf{x} - \theta\|_{\mathbf{w}^*} dP \\ &\quad + \eta/6 = \eta/3. \end{aligned}$$

The second inequality follows from equation (4). Thus we get,  $\Phi(\Theta_{n,s}, \mathbf{w}_{n,s}) - \Phi(\Theta^*, \mathbf{w}^*) = \xi_1 + \xi_2 + \xi_3 \leq \eta/6 + \eta/3 + \eta/3 < \eta$  almost surely. Hence the result.  $\square$

Table S1: NMI values for Simulation 1, showing the effect of increasing number of clusters.

|                   | $d = 5$               | $d = 10$              | $d = 20$              | $d = 50$              | $d = 100$             |
|-------------------|-----------------------|-----------------------|-----------------------|-----------------------|-----------------------|
| $k$ -means        | 0.3913 (0.002)        | 0.3701 (0.002)        | 0.3674 (0.003)        | 0.3629(0.002)         | 0.3517 (0.003)        |
| $WK$ -means       | 0.5144(0.002)         | 0.50446(0.003)        | 0.5050(0.003)         | 0.5026(0.005)         | 0.5029(0.003)         |
| Power $k$ -means  | 0.3924(0.001)         | 0.3873(0.002)         | 0.3722 (0.001)        | 0.3967 (0.003)        | 0.3871 (0.004)        |
| Sparse $k$ -means | 0.3679 (0.002)        | 0.3677 (0.002)        | 0.3668 (0.001)        | 0.3675 (0.002)        | 0.3637 (0.002)        |
| EWP- $k$ -means   | <b>0.9641</b> (0.001) | <b>0.9217</b> (0.001) | <b>0.9139</b> (0.001) | <b>0.9465</b> (0.001) | <b>0.9082</b> (0.003) |

Table S2: NMI values for Simulation 2, showing the effect of the number of unimportant features.

|                   | $k = 20$              | $k = 100$             | $k = 200$             | $k = 500$             |
|-------------------|-----------------------|-----------------------|-----------------------|-----------------------|
| $k$ -means        | 0.0674(0.001)         | 0.2502(0.021)         | 0.3399 (0.031)        | 0.3559 (0.014)        |
| $WK$ -means       | 0.0587(0.001)         | 0.2247(0.002)         | 0.3584(0.018)         | 0.3678(0.009)         |
| Power $k$ -means  | 0.0681(0.001)         | 0.2785(0.001)         | 0.3578 (0.002)        | 0.3867(0.001)         |
| Sparse $k$ -means | 0.0679(0.001)         | 0.2490(0.058)         | 0.6705(0.007)         | 0.3537 (0.002)        |
| EWP- $k$ -means   | <b>0.9887</b> (0.001) | <b>0.9844</b> (0.002) | <b>0.9756</b> (0.001) | <b>0.9908</b> (0.001) |

Table S3: Source and Description of the Datasets

| Datasets        | Source          | k  | n    | p    |
|-----------------|-----------------|----|------|------|
| Iris            | Keel Repository | 3  | 150  | 4    |
| Automobile      | Keel Repository | 6  | 150  | 25   |
| Mammographic    | Keel Repository | 2  | 830  | 5    |
| Newthyroid      | Keel Repository | 3  | 215  | 5    |
| Wine            | Keel Repository | 3  | 178  | 13   |
| WDBC            | Keel Repository | 2  | 569  | 30   |
| Movement Libras | Keel Repository | 15 | 360  | 90   |
| Wall Robot 4    | UCI Repository  | 4  | 5456 | 4    |
| WarpAR10P       | ASU Repository  | 10 | 130  | 2400 |
| WarpPIE10P      | ASU Repository  | 10 | 210  | 2420 |

Table S4: NMI of Real-Life Datasets

| Datasets     | $k$ -means                  | Power $k$ -means            | $WK$ -means                 | Sparse $k$ -means           | EWP- $k$ -means       |
|--------------|-----------------------------|-----------------------------|-----------------------------|-----------------------------|-----------------------|
| Newthyroid   | 0.4031 <sup>+</sup> (0.002) | 0.2625 <sup>+</sup> (0.002) | 0.4072 <sup>+</sup> (0.004) | 0.1022 <sup>+</sup> (0.002) | <b>0.5321</b> (0.003) |
| Automobile   | 0.1655 <sup>+</sup> (0.009) | 0.2034 <sup>+</sup> (0.010) | 0.1687 <sup>+</sup> (0.005) | 0.1684 <sup>+</sup> (0.007) | <b>0.3111</b> (0.003) |
| WarpAR10P    | 0.1708 <sup>+</sup> (0.042) | 0.2334 <sup>+</sup> (0.031) | 0.2016 <sup>+</sup> (0.019) | 0.1853 <sup>+</sup> (0.008) | <b>0.3502</b> (0.047) |
| WarpPIE10P   | 0.2406 <sup>≈</sup> (0.031) | 0.2407 <sup>≈</sup> (0.028) | 0.1804 <sup>+</sup> (0.022) | 0.1799 <sup>+</sup> (0.002) | <b>0.2761</b> (0.041) |
| Iris         | 0.7581 <sup>+</sup> (0.003) | 0.7885 <sup>+</sup> (0.005) | 0.7419 <sup>+</sup> (0.005) | 0.8138 <sup>≈</sup> (0.002) | <b>0.8498</b> (0.005) |
| Wine         | 0.4287 <sup>+</sup> (0.001) | 0.6427 <sup>+</sup> (0.005) | 0.4167 <sup>+</sup> (0.002) | 0.4287 <sup>+</sup> (0.001) | <b>0.7476</b> (0.003) |
| Mammographic | 0.1074 <sup>+</sup> (0.001) | 0.0194 <sup>+</sup> (0.003) | 0.1158 <sup>+</sup> (0.001) | 0.1102 <sup>+</sup> (0.002) | <b>0.4051</b> (0.002) |
| WDBC         | 0.4636 <sup>+</sup> (0.002) | 0.0056 <sup>+</sup> (0.005) | 0.4648 <sup>+</sup> (0.002) | 0.4674 <sup>+</sup> (0.003) | <b>0.6564</b> (0.001) |
| LIBRAS       | 0.5532 <sup>≈</sup> (0.017) | 0.3390 <sup>+</sup> (0.020) | 0.4615 <sup>+</sup> (0.021) | 0.2543 <sup>+</sup> (0.014) | <b>0.5751</b> (0.009) |
| Wall Robot 4 | 0.1677 <sup>+</sup> (0.027) | 0.1836 <sup>+</sup> (0.013) | 0.1716 <sup>+</sup> (0.030) | 0.1861 <sup>+</sup> (0.012) | <b>0.2344</b> (0.003) |

Table S5: ARI values for Simulation 1, showing the effect of the number of unimportant features.

|             | $d = 5$       | $d = 10$      | $d = 20$      | $d = 50$      | $d = 100$     |
|-------------|---------------|---------------|---------------|---------------|---------------|
| $k$ -means  | 0.0120        | 0.0173        | 0.0314        | 0.0114        | 0.0154        |
| $WK$ -means | 0.0746        | 0.0846        | 0.0145        | 0.0121        | 0.0012        |
| Power       | 0.0125        | 0.0249        | 0.0462        | 0.0164        | 0.0097        |
| Sparse      | 0.0245        | 0.0148        | 0.0551        | 0.0137        | 0.0178        |
| EWP         | <b>0.8963</b> | <b>0.9016</b> | <b>0.8961</b> | <b>0.8831</b> | <b>0.8615</b> |

Table S6: ARI values for Simulation 2, showing the effect of increasing number of clusters.

| Algorithm        | $k = 20$      | $k = 100$     | $k = 200$     | $k = 500$     |
|------------------|---------------|---------------|---------------|---------------|
| $k$ -means       | 0.0371        | 0.1671        | 0.2486        | 0.2743        |
| $WK$ -means      | 0.0247        | 0.1293        | 0.2573        | 0.2795        |
| Power $k$ -means | 0.0471        | 0.1843        | 0.2462        | 0.2936        |
| Sparse           | 0.0148        | 0.1547        | 0.5043        | 0.2847        |
| EWP              | <b>0.9701</b> | <b>0.9826</b> | <b>0.9612</b> | <b>0.9982</b> |

Table S7: Mean ARI and (standard deviation), GLIOMA data

| $k$ -means    | $WK$ -means   | Power        | Sparse       | EWP                 |
|---------------|---------------|--------------|--------------|---------------------|
| 0.281 (0.059) | 0.288 (0.068) | 0.287(0.037) | 0.007(0.006) | <b>0.448(0.001)</b> |

Table S8: ARI values on Benchmark Real Data

| Dataset      | $k$ -means                 | $WK$ -means                | Power $k$ -means           | Sparse $k$ -means          | EWP $k$ -means      |
|--------------|----------------------------|----------------------------|----------------------------|----------------------------|---------------------|
| Newthyroid   | 0.483 <sup>+</sup> (0.002) | 0.164 <sup>+</sup> (0.003) | 0.458 <sup>+</sup> (0.003) | 0.053 <sup>+</sup> (0.003) | <b>0.625(0.001)</b> |
| Automobile   | 0.111 <sup>+</sup> (0.005) | 0.136 <sup>+</sup> (0.005) | 0.111 <sup>+</sup> (0.002) | 0.133 <sup>+</sup> (0.004) | <b>0.181(0.002)</b> |
| WarpAR10P    | 0.183 <sup>+</sup> (0.003) | 0.258 <sup>+</sup> (0.003) | 0.231 <sup>+</sup> (0.003) | 0.207 <sup>+</sup> (0.002) | <b>0.412(0.003)</b> |
| WarpPIE10P   | 0.253 <sup>≈</sup> (0.005) | 0.267 <sup>≈</sup> (0.003) | 0.214 <sup>+</sup> (0.002) | 0.205 <sup>+</sup> (0.004) | <b>0.323(0.003)</b> |
| Iris         | 0.671 <sup>+</sup> (0.008) | 0.748 <sup>+</sup> (0.005) | 0.706 <sup>+</sup> (0.005) | 0.759 <sup>≈</sup> (0.007) | <b>0.904(0.001)</b> |
| Wine         | 0.364 <sup>+</sup> (0.003) | 0.561 <sup>+</sup> (0.002) | 0.360 <sup>+</sup> (0.001) | 0.434 <sup>+</sup> (0.001) | <b>0.794(0.002)</b> |
| Mammographic | 0.137 <sup>+</sup> (0.003) | 0.001 <sup>+</sup> (0.002) | 0.137 <sup>+</sup> (0.005) | 0.137 <sup>+</sup> (0.010) | <b>0.356(0.004)</b> |
| WDBC         | 0.490 <sup>+</sup> (0.004) | 0.013 <sup>+</sup> (0.005) | 0.482 <sup>+</sup> (0.004) | 0.491 <sup>+</sup> (0.004) | <b>0.715(0.005)</b> |
| LIBRAS       | 0.302 <sup>≈</sup> (0.004) | 0.112 <sup>+</sup> (0.006) | 0.481 <sup>+</sup> (0.001) | 0.589 <sup>+</sup> (0.003) | <b>0.592(0.003)</b> |
| Wall Robot 4 | 0.075 <sup>+</sup> (0.006) | 0.109 <sup>+</sup> (0.002) | 0.209 <sup>+</sup> (0.003) | 0.080 <sup>+</sup> (0.001) | <b>0.288(0.004)</b> |

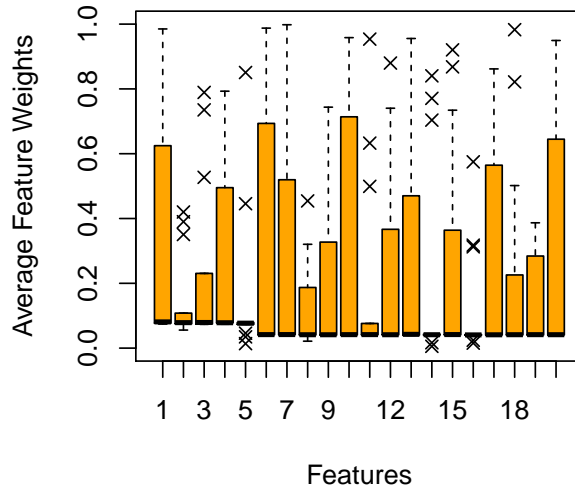

Figure S1: Boxplot shows that  $WK$ -means fails to identify the correct features.
